# Supplementary material for: ZnO nanorods assembled with different porphyrins – size-tunable hybrid particles
Source: Royal Society of Chemistry journal article supplement (doi:10.1039/c6ra26964h), 2017-01-01
Supplement: c6ra26964h1.pdf [file c6ra26964h1.pdf]

## **ZnO nanorods assembled with different porphyrins - size-tunable hybrid particles**

Jasmin Düring, Franziska Gröhn<sup>#</sup>

Department of Chemistry and Pharmacy and Interdisciplinary Center for Molecular Materials (ICMM), Friedrich-Alexander-Universität Erlangen-Nürnberg, Egerlandstrasse 3, D-91058 Erlangen, Germany

### ***Supporting Information***

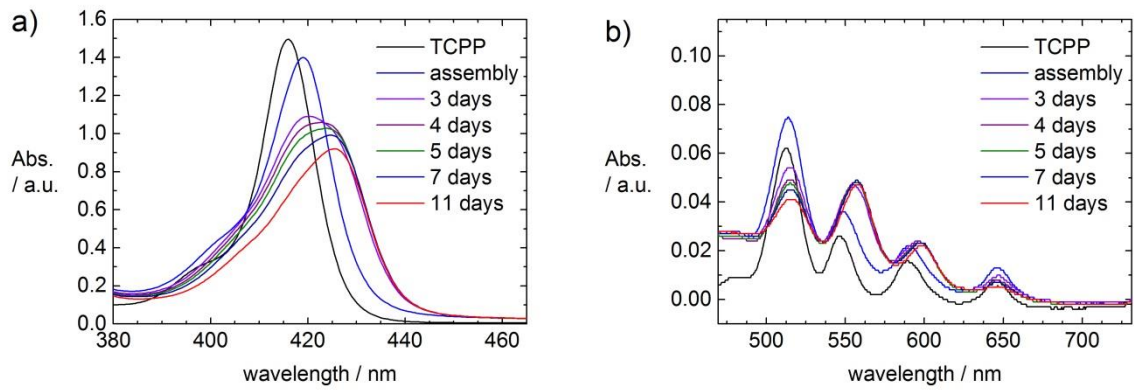

**Figure S1.** Time dependent UV-Vis of ZnO-TCPP assemblies. Sample with  $r_M = 106$ ,  $c(\text{TCPP}) = 3.3 \cdot 10^{-6} \text{ mol L}^{-1}$ .

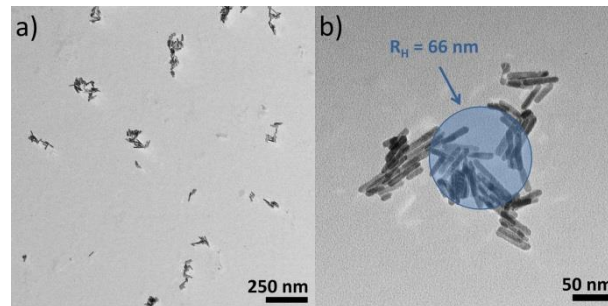

**Figure S2.** TEM of a ZnO-TPPS assembly with  $r_M(\text{TPPS}/\text{ZnO}) = 4000$  and  $R_H = 66 \text{ nm}$ . a) overview of several assemblies, b) magnification of a single assembly, where the blue sphere corresponds to the hydrodynamic radius as measured in DLS.
